# Supplementary material for: Fermi–Dirac statistics in correlation between electronic entropy and spatial confinement of liquid crystal-perovskite nanohybrids
Source: Royal Society of Chemistry journal article supplement (doi:10.1039/d4tc00212a), 2024-01-01
Supplement: d4tc00212a1.pdf [file d4tc00212a1.pdf]

## Electronic Supplementary Information

Fermi-Dirac statistics in correlation between electronic entropy and spatial  
confinement of liquid crystal-perovskite nanohybrids

Deejan Debnath,<sup>a</sup> Prithish Halder,<sup>b</sup> Barnali Saha,<sup>c</sup> Himadri Acharya<sup>a</sup>  
and Sujit Kumar Ghosh<sup>c\*</sup>

<sup>a</sup>Department of Chemistry, Assam University, Silchar-788011, India

<sup>b</sup>Theoretical Astrophysics Group, Indian Institute of Astrophysics, Bengaluru-560034, India

<sup>c</sup>Physical Chemistry Section, Department of Chemistry, Jadavpur University,  
Kolkata-700032, India

E-mail: [skghosh.chemistry@jadavpuruniversity.in](mailto:skghosh.chemistry@jadavpuruniversity.in); Tel: +91-33-24572770

### ESI 1. Python code for the calculation of electronic entropy

A flowchart for the calculation of electronic entropy using Python code has been shown in Scheme S1.

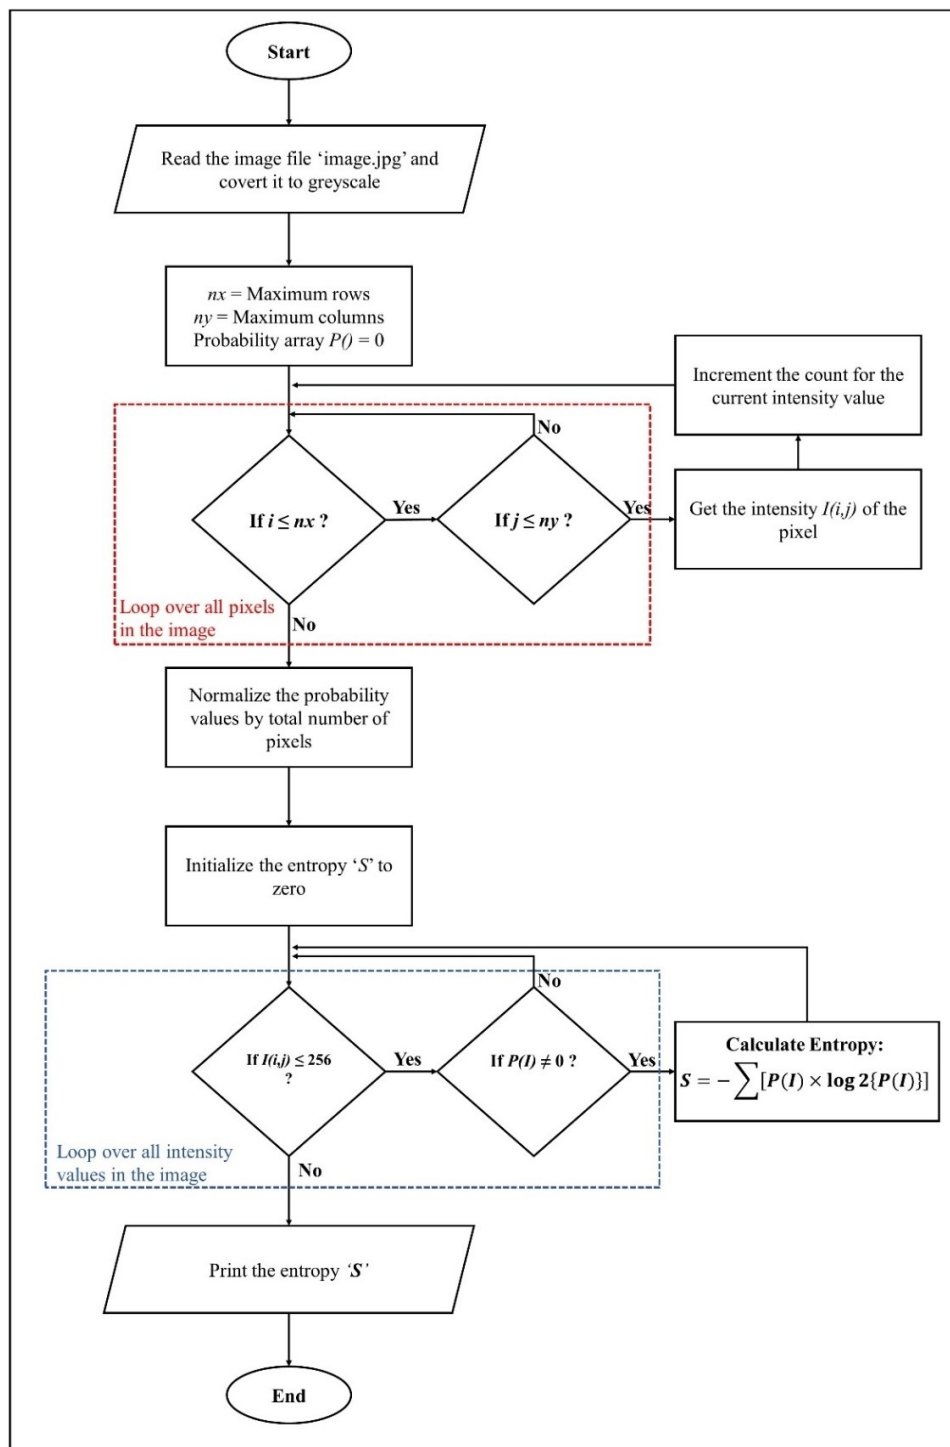

**Scheme S1.** Flow diagram of the algorithm to calculate the total entropy of an image.
